# Supplementary material for: Homer signaling pathways as effective therapeutic targets for ischemic and traumatic brain injuries and retinal lesions
Source: PubMed Central journal article supplement — Neural Regen Res. 2021 Dec 10;17(7):1454–61. doi: 10.4103/1673-5374.330588 (PMC8771115; doi:10.4103/1673-5374.330588), 2021-12-10
Supplement: NRR-17-1454_Suppl1.pdf [file NRR-17-1454_Suppl1.pdf]

## OPEN PEER REVIEW REPORT 1

**Name of journal:** Neural Regeneration Research

**Manuscript No:** NRR-D-21-00112

**Title:** The Homer Signaling under Ischemic and Traumatic Insults in Central Nervous System

**Reviewer's Name:** Janne Koskimäki

**Reviewer's country:** Finland

### COMMENTS TO AUTHORS

I have reviewed the submitted manuscript entitled "The Homer Signaling under Ischemic and Traumatic Insults in Central Nervous System". The author(s) comprehensively describe several aspects of homer signaling. The manuscript is mainly well written and clear, however, sometimes it feels hard to follow. I recommend that the figure and table are presented before the conclusion section, or at least some figure must be presented where molecular mechanisms of Homer(s) are introduced with a figure. However, the presented figure is informative and well prepared. Literature is properly cited. Why authors review traumatic and ischemic insults and leave hemorrhagic strokes out? How author(s) selected the publications for this review?
